# Supplementary material for: ULK1-mediated phosphorylation of ATG14 promotes autophagy and is impaired in Huntington’s disease models
Source: Springer Nature journal article supplement (doi:10.1186/s13024-016-0141-0), 2016-12-01

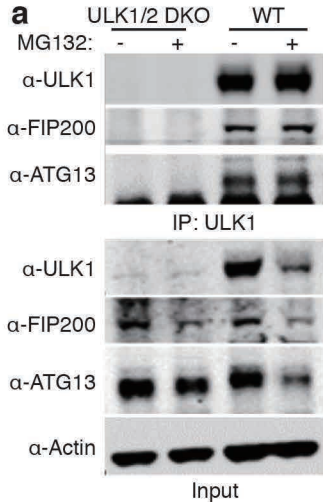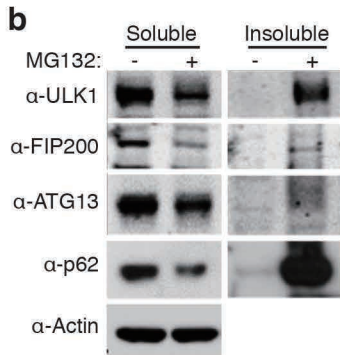

Supplement: MOESM3 [file 11910066]
